# Supplementary material for: HGDP and HapMap Analysis by Ancestry Mapper Reveals Local and Global Population Relationships
Source: PubMed Central journal article supplement (PMC3506643; doi:10.1371/journal.pone.0049438), 2012-11-26
Supplement: pone.0049438.s002.pdf [file pone.0049438.s002.pdf]

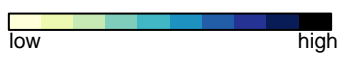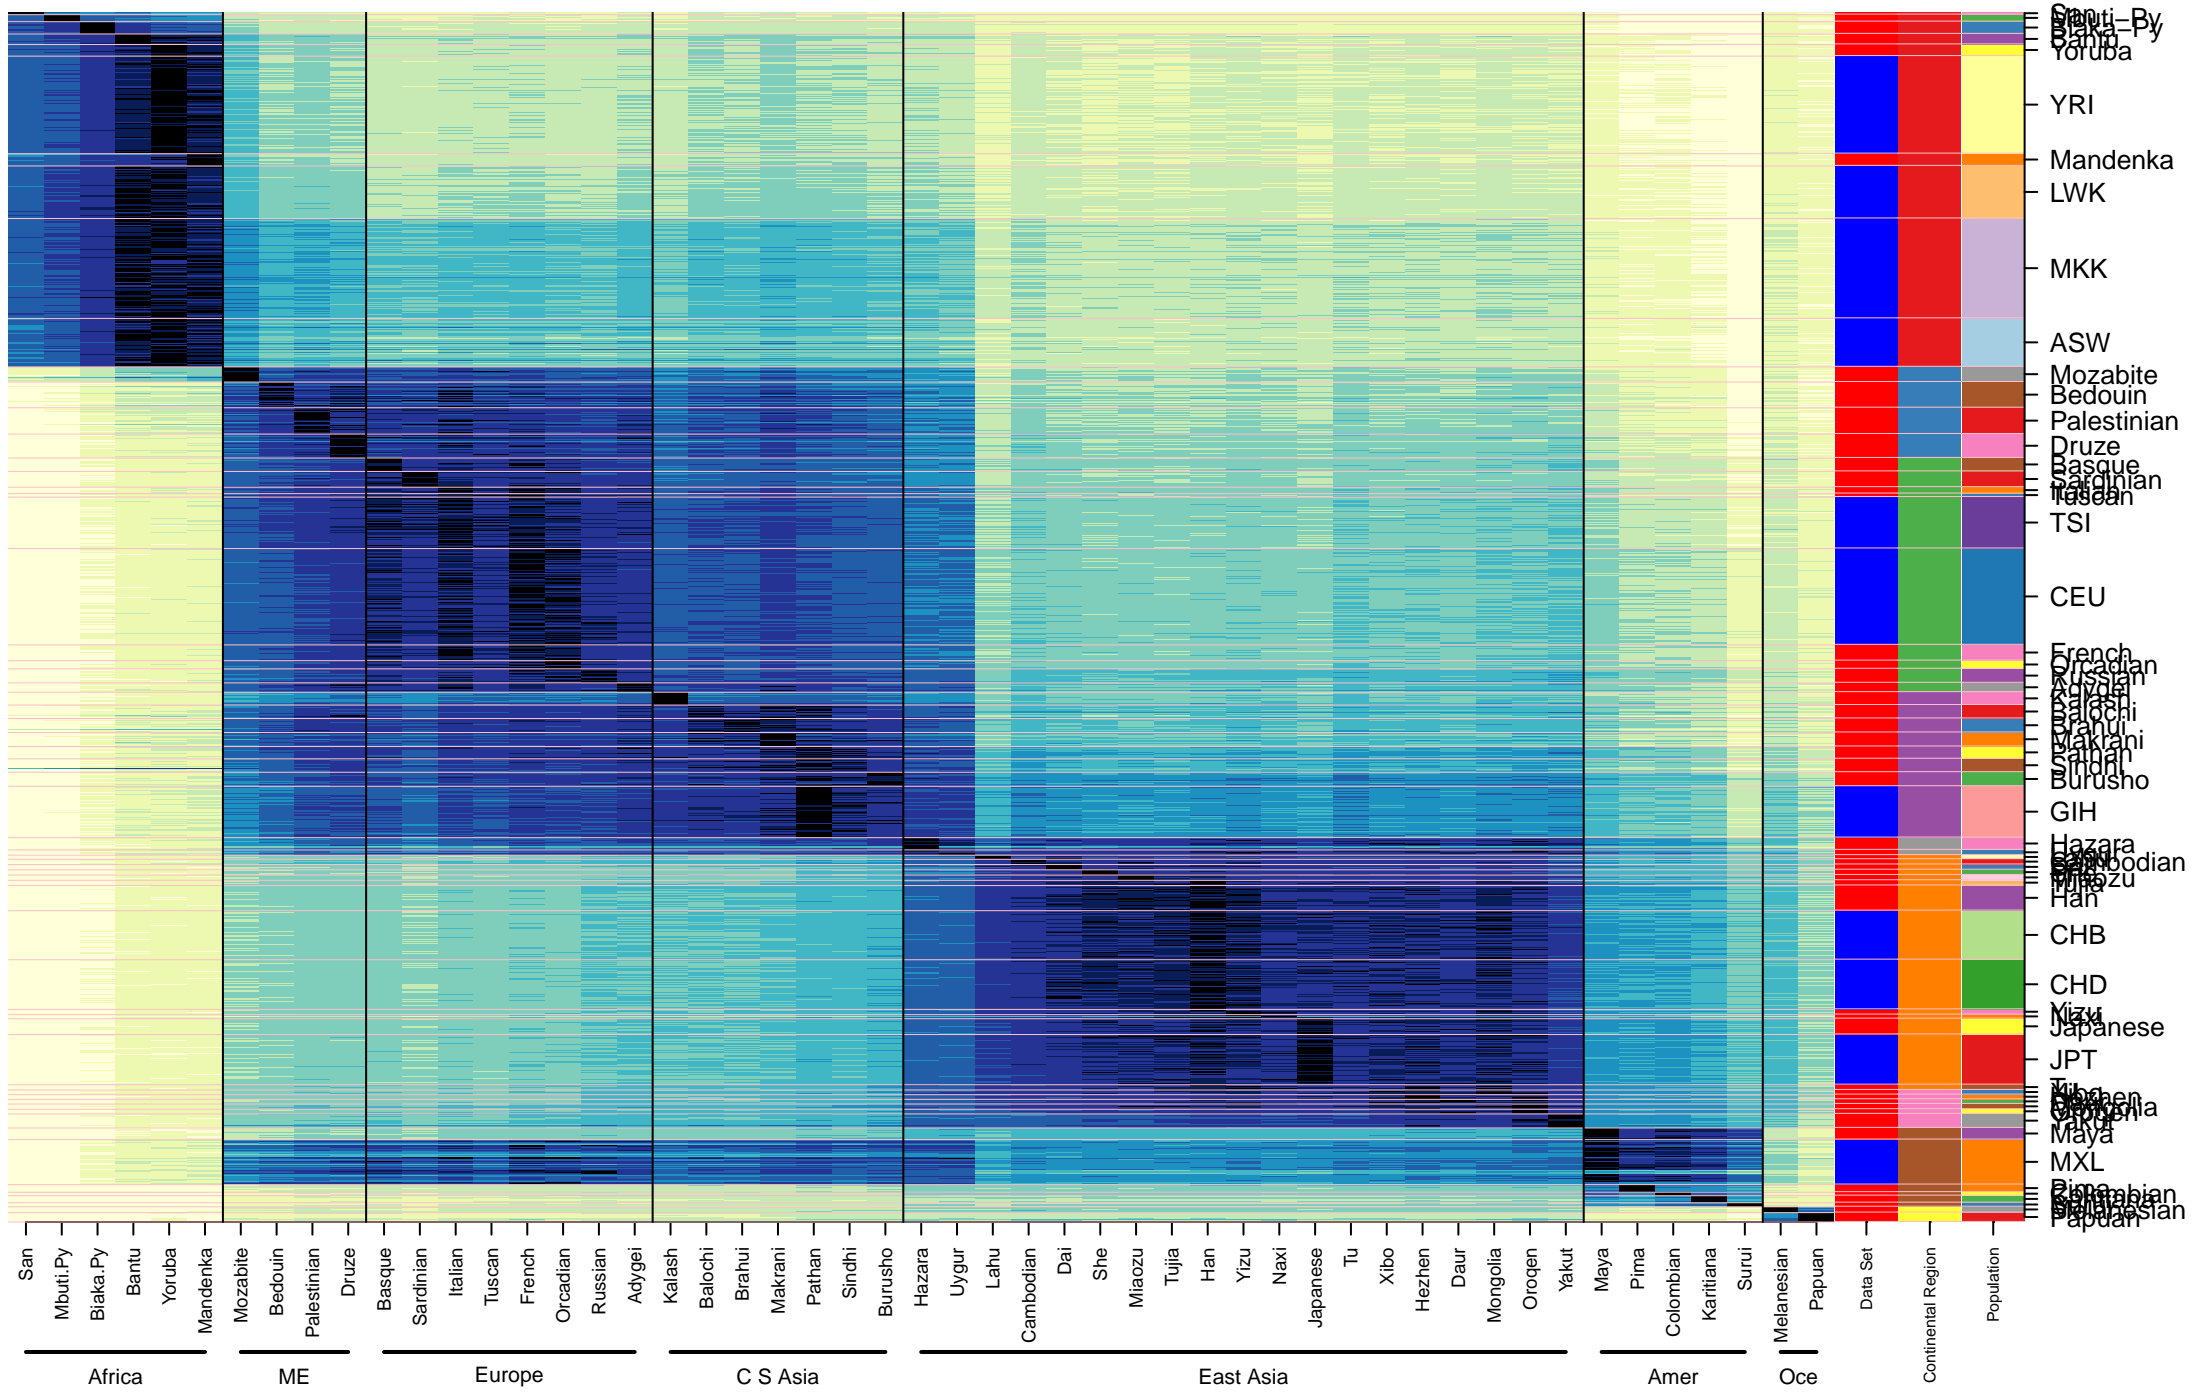

San Mbuti.Py Biaka.Py Bantu Yoruba Mandenka Mozabite Bedouin Palestinian Druze Basque Sardinian Italian Tuscan French Orcadian Russian Adygei Kalash Balochi Brahui Makrani Pathan Sindhi Burusho Hazara Uygur Lahu Cambodian Dai She Miaozi Tujia Han Yizu Naxi Japanese Tu Xibo Hezhen Daur Mongolia Oroqen Yakut Maya Pima Colombian Karitiana Surui Melanesian Papuan Data Set Continental Region Population Rimbobian Papuan

Africa

ME

Europe

C S Asia

East Asia

Amer

Oce

Continental Region

Population
