# Supplementary material for: HGDP and HapMap Analysis by Ancestry Mapper Reveals Local and Global Population Relationships
Source: PubMed Central journal article supplement (PMC3506643; doi:10.1371/journal.pone.0049438), 2012-11-26

low high

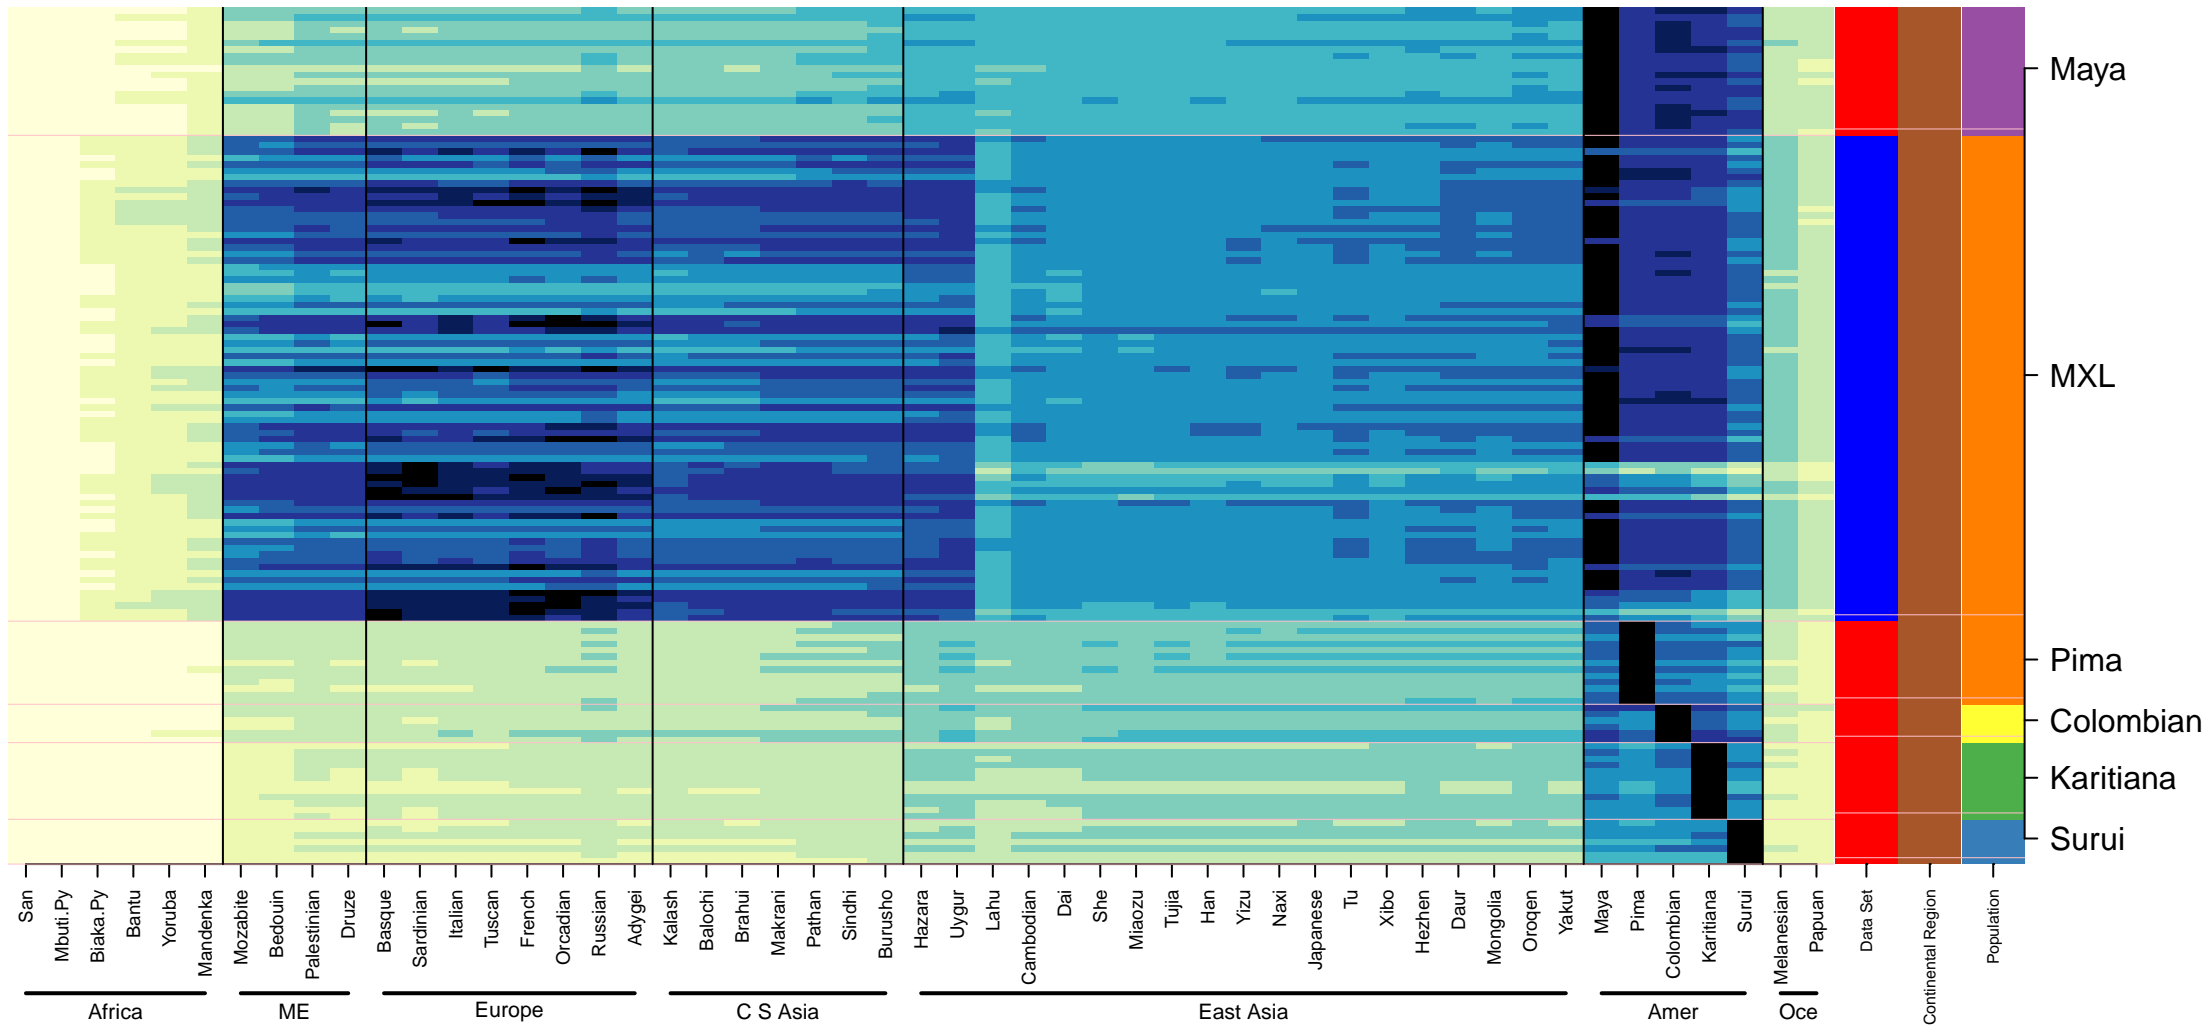

Supplement: pone.0049438.s008.pdf [file pone.0049438.s008.pdf]
