# Supplementary material for: HGDP and HapMap Analysis by Ancestry Mapper Reveals Local and Global Population Relationships
Source: PLoS One. 2012 Nov 26;7(11):e49438. doi: 10.1371/journal.pone.0049438 (PMC3506643; doi:10.1371/journal.pone.0049438)
Supplement: Table S2 — Genetic and geographical distance to the Bantu. Genetic and geographical distance to the Bantu. (XLS) [file pone.0049438.s011.xls]

## Sheet: Sheet1
Population	median	dist	fitted2	Data	Pheno_2	Colors_1	Colors_2	Order_2	Pch
San	0.740967	0	0.764313	HGDP	AFR	#F781BF	#E41A1C	10_AFR	20
Bantu	0.861325	966.4	0.799799	HGDP	AFR	#984EA3	#E41A1C	10_AFR	20
Mbuti-Py	0.827752	2635	0.854795	HGDP	AFR	#4DAF4A	#E41A1C	10_AFR	20
MKK	0.881454	2756	0.858467	HapMap	AFR	#CAB2D6	#E41A1C	10_AFR	20
LWK	0.861905	2787	0.8594	HapMap	AFR	#FDBF6F	#E41A1C	10_AFR	20
Biaka-Py	0.832741	2799	0.859761	HGDP	AFR	#377EB8	#E41A1C	10_AFR	20
ASW	0.87766	3447	0.878594	HapMap	AFR	#A6CEE3	#E41A1C	10_AFR	20
YRI	0.863495	4079.7	0.895754	HapMap	AFR	#FFFF99	#E41A1C	10_AFR	20
Yoruba	0.863126	4079.7	0.895754	HGDP	AFR	#FFFF33	#E41A1C	10_AFR	20
Mandenka	0.86595	5700	0.934609	HGDP	AFR	#FF7F00	#E41A1C	10_AFR	20
Bedouin	0.979146	6000	0.940921	HGDP	ME	#A65628	#377EB8	20_ME	20
Druze	0.983803	6106	0.943076	HGDP	ME	#F781BF	#377EB8	20_ME	20
Palestinian	0.974104	6106	0.943076	HGDP	ME	#E41A1C	#377EB8	20_ME	20
Mozabite	0.958208	6165	0.944258	HGDP	ME	#999999	#377EB8	20_ME	20
Adygei	0.985368	8362.7	0.978285	HGDP	EUR	#999999	#4DAF4A	30_EUR	20
TSI	0.987076	8978	0.983821	HapMap	EUR	#6A3D9A	#4DAF4A	30_EUR	20
Italian	0.989361	9088	0.984587	HGDP	EUR	#FF7F00	#4DAF4A	30_EUR	20
Sardinian	0.992091	9166	0.985078	HGDP	EUR	#E41A1C	#4DAF4A	30_EUR	20
Tuscan	0.987644	9166	0.985078	HGDP	EUR	#377EB8	#4DAF4A	30_EUR	20
Russian	0.990385	9310	0.985895	HGDP	EUR	#984EA3	#4DAF4A	30_EUR	20
CEU	0.989723	9333	0.986017	HapMap	EUR	#1F78B4	#4DAF4A	30_EUR	20
French	0.989655	9703	0.987836	HGDP	EUR	#F781BF	#4DAF4A	30_EUR	20
Basque	0.99277	9872	0.988695	HGDP	EUR	#A65628	#4DAF4A	30_EUR	20
Makrani	0.981517	9901	0.988851	HGDP	CSA	#FF7F00	#984EA3	40_CSA	20
Balochi	0.990797	9975	0.989248	HGDP	CSA	#E41A1C	#984EA3	40_CSA	20
Brahui	0.983395	9975	0.989248	HGDP	CSA	#377EB8	#984EA3	40_CSA	20
Pathan	0.984174	10123	0.990009	HGDP	CSA	#FFFF33	#984EA3	40_CSA	20
Hazara	0.987577	10161	0.9902	HGDP	CSEA	#F781BF	#999999	52_CSEA	20
Kalash	0.992044	10161	0.9902	HGDP	CSA	#F781BF	#984EA3	40_CSA	20
Burusho	0.984921	10293	0.990858	HGDP	CSA	#4DAF4A	#984EA3	40_CSA	20
Orcadian	0.990652	10347	0.991128	HGDP	EUR	#FFFF33	#4DAF4A	30_EUR	20
Sindhi	0.983077	10513	0.991932	HGDP	CSA	#A65628	#984EA3	40_CSA	20
Uygur	0.985391	10737	0.992926	HGDP	CSEA	#377EB8	#999999	52_CSEA	20
Xibo	1.0002	10756	0.993006	HGDP	NEA	#377EB8	#F781BF	56_NEA	20
GIH	0.98354	10904	0.993607	HapMap	CSA	#FB9A99	#984EA3	40_CSA	20
Tu	0.998687	12625	0.999002	HGDP	EA	#A65628	#FF7F00	54_SEA	20
Naxi	1.00192	13081	1.0004	HGDP	EA	#FF7F00	#FF7F00	54_SEA	20
Yizu	1.00338	13217	1.00085	HGDP	EA	#F781BF	#FF7F00	54_SEA	20
Yakut	1.00349	13314	1.00118	HGDP	NEA	#999999	#F781BF	56_NEA	20
Lahu	1.00624	13325	1.00122	HGDP	EA	#FFFFB3	#FF7F00	54_SEA	20
Mongolia	1.0009	13331	1.00124	HGDP	NEA	#A65628	#F781BF	56_NEA	20
Dai	1.0039	13388	1.00145	HGDP	EA	#377EB8	#FF7F00	54_SEA	20
Oroqen	1.00348	13597	1.00222	HGDP	NEA	#FFFF33	#F781BF	56_NEA	20
CHB	1.00384	13648	1.0024	HapMap	EA	#B2DF8A	#FF7F00	54_SEA	20
CHD	1.0041	13648	1.0024	HapMap	EA	#33A02C	#FF7F00	54_SEA	20
Tujia	1.00559	13658	1.00243	HGDP	EA	#FDB462	#FF7F00	54_SEA	20
Miaozu	1.00641	13717	1.00264	HGDP	EA	#FCCDE5	#FF7F00	54_SEA	20
Daur	1.00237	13729	1.00268	HGDP	NEA	#4DAF4A	#F781BF	56_NEA	20
Han	1.00327	13754	1.00276	HGDP	EA	#984EA3	#FF7F00	54_SEA	20
Hezhen	1.00396	14300	1.00442	HGDP	NEA	#FF7F00	#F781BF	56_NEA	20
Cambodian	0.997512	14415	1.00472	HGDP	EA	#E41A1C	#FF7F00	54_SEA	20
She	1.00563	14599	1.00519	HGDP	EA	#4DAF4A	#FF7F00	54_SEA	20
Japanese	1.00561	15291	1.00671	HGDP	EA	#FFFF33	#FF7F00	54_SEA	20
JPT	1.00417	15574	1.00723	HapMap	EA	#E31A1C	#FF7F00	54_SEA	20
Papuan	1.02271	18779	1.01225	HGDP	OCE	#E41A1C	#FFFF33	70_OCE	20
Melanesian	1.01185	19929	1.01466	HGDP	OCE	#999999	#FFFF33	70_OCE	20
Pima	1.03222	21910	1.01994	HGDP	AME	#FF7F00	#A65628	60_AME	20
MXL	0.98281	22972	1.02362	HapMap	AME	#FF7F00	#A65628	60_AME	20
Maya	1.01552	23520	1.02582	HGDP	AME	#984EA3	#A65628	60_AME	20
Karitiana	1.04436	25497	1.03577	HGDP	AME	#4DAF4A	#A65628	60_AME	20
Surui	1.05189	25497	1.03577	HGDP	AME	#377EB8	#A65628	60_AME	20
Colombian	1.03495	26038	1.03913	HGDP	AME	#FFFF33	#A65628	60_AME	20
